## APNEIC OXYGEN UPTAKE IN THE TORPID BAT, *EPTESICUS FUSCUS*

BY JOSEPH M. SZEWCZAK\* AND DONALD C. JACKSON

*Division of Biology and Medicine, Brown University, Providence,  
Rhode Island 02912 USA*

*Accepted 24 July 1992*

### Summary

Like many mammalian heterotherms, the big brown bat, *Eptesicus fuscus*, breathes intermittently during torpor. By exploiting this bat's preference to roost in crevices, we could separately measure O<sub>2</sub> uptake during ventilatory bouts and apneic periods using a flow-through metabolic chamber with a small dead space volume and short time constant. Oxygen uptake was measured during apneas ranging from 10 to 150 min duration at body temperatures of 20, 10 and 5 °C. The fraction of total O<sub>2</sub> uptake acquired during apnea was 0.26±0.03 (9), 0.54±0.10 (5) and 0.35±0.04 (3) for body temperatures of 20, 10 and 5 °C, respectively. Cardiogenic pulsations during apnea visible on plethysmographic pressure traces and theoretical calculations of airway and cutaneous diffusion potentials support the notion that apneic O<sub>2</sub> uptake occurs down an open airway by both diffusion and bulk convection.

### Introduction

Many hibernating mammals alternate periods of breathing with apneas of variable duration. During studies of acid–base state and ventilation in the torpid bat, *Eptesicus fuscus*, it became apparent that significant O<sub>2</sub> uptake was occurring during these apneas. A previous study demonstrated cutaneous exchange of CO<sub>2</sub> in euthermic *Eptesicus fuscus* (Herreid *et al.* 1968), but did not reveal significant cutaneous exchange of O<sub>2</sub>. Theoretical calculations support the notion that apnea is prolonged in torpid hedgehogs by passive diffusion of O<sub>2</sub> into the lungs, a process termed apneic oxygenation (Clausen and Ersland, 1968; Malan, 1982). This study presents direct evidence for O<sub>2</sub> uptake during apnea in *Eptesicus fuscus* and how it is influenced by changing body temperature ( $T_b$ ).

### Materials and methods

#### *Animals*

Big brown bats, *Eptesicus fuscus*, were captured locally in accordance with a scientific

\*Present address: Deep Springs College, HC 72, Box 45001, via Dyer, Nevada 89010, USA.

Key words: apnea, apneic oxygen uptake, bat, cardiogenic pulsations, hibernation, intermittent breathing, torpor, *Eptesicus fuscus*.

collector's permit issued by the Rhode Island Department of Environmental Management. Bats were kept in a specially prepared colony room maintained at 25 °C. Outgoing ventilation from this colony room flowed through anti-viral filters. The bats were housed in stainless-steel cages in groups according to cage size and fed live mealworms raised on a diet of flour, chicken feed, potato slices and monkey chow. They had free access to vitamin-supplemented water (Poly-Vi-Sol or equivalent) at all times. Individual bats were identified by numbered bands on their forearms. Body mass upon capture ranged from 14 to 16 g, but increased to over 20 g in some individuals during captivity.

#### *Experimental procedure*

Bats were placed in the experimental chamber at ambient temperatures selected to reach target  $T_b$  values of 5, 10, 20 or 30 °C while simultaneously monitoring  $T_b$ , ventilation, instantaneous  $O_2$  uptake and the electrocardiogram (ECG). At least 2 h of steady-state physiological conditions were observed before acquiring data.

#### *Physiological chamber*

A specially made chamber permitted simultaneous monitoring of  $T_b$ , ventilation, instantaneous  $O_2$  uptake and ECG without disturbing the bat. Details of the chamber and analytical procedures are described elsewhere (Szewczak and Jackson, 1992a,b). In brief, the chamber exploits this bat's penchant for roosting in crevices. Although the chamber's interior is only slightly larger than the bat's, they voluntarily crawled into it without a complete arousal from torpor after only a few training sessions. The small dead space within the chamber facilitated the detection of respiratory movements, while providing a short time constant for monitoring gas exchange with a sensitivity sufficient to reveal  $O_2$  uptake from single breaths. To ensure that the system reliably measured apneic  $O_2$  uptake, it was tested using a *faux* bat in the chamber. This procedure yielded zero  $O_2$  uptake following the identical calibration protocol used with the experimental bats. A computerized data-acquisition system collected oxygen uptake and respiratory movement data using programs that we had developed (IBM XT with Data Translation DT2801 A/D board, ASYST data acquisition and data management software: Keithly-ASYST Software Technologies, Inc., version 3.0).

#### *Calculation of oxygen uptake*

During experiments, gas flow through the chamber was from tanks of pressurized air. This eliminated any potential errors from variations in gas composition. A bypass circuit, however, enabled room air to ventilate the chamber during  $T_b$  equilibration and analyzer calibration of the experimental gas flow (Szewczak and Jackson, 1992b). Total  $O_2$  uptake was calculated by integrating the instantaneous rate of  $O_2$  uptake record with respect to time. As far as possible, total  $O_2$  uptake was calculated in phase with ventilatory cycles (the onset of a ventilatory bout to the end of an apneic interval). Steady-state sections from apneic periods of the instantaneous  $O_2$  uptake recording were separately integrated with respect to time to determine rates of apneic  $O_2$  uptake. The fraction of time that was apneic was calculated from the ventilation recordings and then applied to the rates of

apneic O<sub>2</sub> uptake to determine the total apneic O<sub>2</sub> uptake. We assumed somatic metabolism to be independent of ventilatory state because of the uniform heart rate from ventilation to apnea.

### Results

Below  $T_b=30^\circ\text{C}$ , a typical ventilatory cycle consisted of a 1- to 9-min bout of rather evenly spaced breaths, followed by an apneic interval. Occasional sporadic breaths punctuated the apneic interval, most commonly at  $T_b=20^\circ\text{C}$ . (Apneic O<sub>2</sub> uptake was calculated only from apneic intervals free from these sporadic breaths.) Apneas averaged longer at  $T_b=10^\circ\text{C}$  ( $56.7\pm 15.3$  min) than at  $T_b=20^\circ\text{C}$  ( $6.1\pm 0.4$  min; maximum: 13.7 min) or  $T_b=5^\circ\text{C}$  ( $6.5\pm 0.8$  min; maximum: 40.9 min). Nevertheless, the fraction of time apneic was similar for these temperatures (Table 1). The longest recorded apnea was 147 min at  $T_b=10^\circ\text{C}$ . This bat was apneic for 95 % of a complete ventilatory cycle with an apneic O<sub>2</sub> uptake rate of  $24.9\ \mu\text{mol O}_2\ \text{h}^{-1}$ .

Heart rate was essentially constant from ventilation to apnea, particularly if compared to heart rates of typical diving mammals, which may reduce heart rate by 80 % during apnea (Elsner, 1965). Cardiogenic pulses synchronous with ECG signals were visible in the plethysmograph pressure records (Fig. 1). These pulses were most pronounced following a ventilatory bout, then steadily decreased during apnea, often becoming lost in the noise. Heart rates were  $8.6\pm 0.6$ ,  $13.5\pm 0.4$  and  $35.4\pm 3.8$  beats  $\text{min}^{-1}$  at  $T_b=5$ , 10 and  $20^\circ\text{C}$ , respectively.

Instantaneous O<sub>2</sub> uptake records (Fig. 2) consisted of spikes due to ventilatory bouts, separated by periods during apnea with O<sub>2</sub> uptake remaining above zero. Simultaneous plethysmography confirmed the apneas indicated in these records. Apneic O<sub>2</sub> uptake was often lower immediately following a ventilatory bout, then increased to a steady level. Total  $\dot{M}_{\text{O}_2}$  fits well with allometric data from other hibernators (Geiser, 1988) only if the O<sub>2</sub> uptake calculation includes the apneic contribution between ventilatory spikes. Apneic intervals were too brief to measure apneic O<sub>2</sub> uptake confidently at  $T_b=30^\circ\text{C}$ .

Table 1. Total and apneic rates of oxygen uptake in the torpid bat, *Eptesicus fuscus*, at  $T_b=5$ , 10 and  $20^\circ\text{C}$

| $T_b$<br>( $^\circ\text{C}$ ) | Total<br>O <sub>2</sub> uptake<br>( $\mu\text{mol h}^{-1}$ ) | Rate of<br>apneic<br>O <sub>2</sub> uptake<br>( $\mu\text{mol h}^{-1}$ ) | Fraction<br>of time<br>apneic | Total<br>apneic<br>O <sub>2</sub> uptake<br>( $\mu\text{mol h}^{-1}$ ) | Fraction<br>of total<br>O <sub>2</sub> uptake<br>during apnea | $n$ ( $N$ ) |
|-------------------------------|--------------------------------------------------------------|--------------------------------------------------------------------------|-------------------------------|------------------------------------------------------------------------|---------------------------------------------------------------|-------------|
| 5                             | $24.0\pm 5.5$                                                | $8.93\pm 1.15$ [24]                                                      | $0.88\pm 0.01$                | $7.9\pm 0.9$                                                           | $0.35\pm 0.04$                                                | 3 (1)       |
| 10                            | $35.2\pm 2.2$                                                | $21.3\pm 3.1$ [24]                                                       | $0.88\pm 0.03$                | $18.9\pm 2.9$                                                          | $0.54\pm 0.10$                                                | 5 (3)       |
| 20                            | $110.0\pm 7.0$                                               | $33.9\pm 1.9$ [47]                                                       | $0.80\pm 0.03$                | $27.2\pm 1.9$                                                          | $0.26\pm 0.03$                                                | 9 (6)       |

Total apneic oxygen uptake is calculated from the rate of apneic oxygen uptake and the apneic time fraction (see Materials and methods).

Data are presented as mean $\pm$ S.E.;  $n$  represents the number of experiments,  $N$  the number of different animals for each  $T_b$ ; numbers in brackets represent the number of apneic intervals used to determine the rate of apneic oxygen uptake.

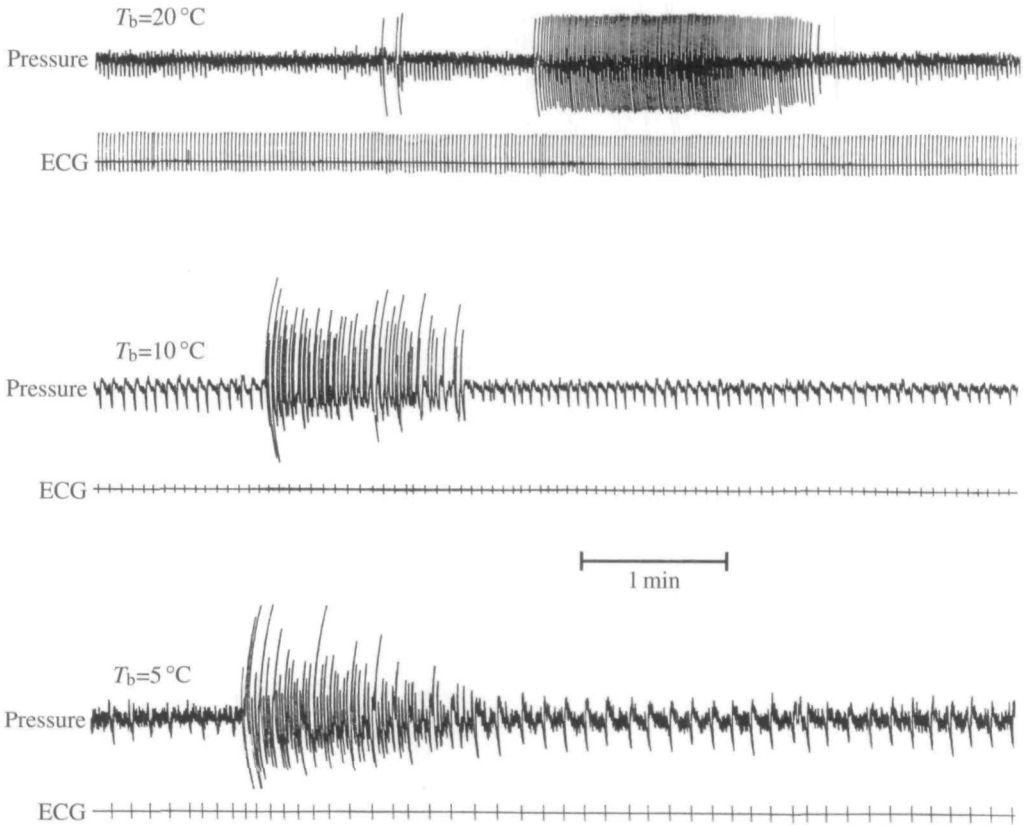

Fig. 1. Simultaneous plethysmograph pressure and ECG recordings from torpid *Eptesicus fuscus* at  $T_b=20$ , 10 and  $5^\circ\text{C}$ . Ventilatory movements are revealed by the large pen excursions. Note the cardiogenic pulsations synchronous with the ECG signals. All records are on the same time scale; however, the pressure traces are not to the same scale because adjustments in amplifier gain were necessary at different temperatures.

The rate of apneic  $\text{O}_2$  uptake increased as  $T_b$  was raised from 5 to  $20^\circ\text{C}$ , but did not maintain a constant fraction of total  $\text{O}_2$  uptake (Fig. 3). The maximum fraction of total  $\text{O}_2$  uptake from apnea was at  $T_b=10^\circ\text{C}$ .

## Discussion

### *Mode of apneic oxygen uptake*

Oxygen uptake during apnea may occur either by cutaneous exchange of gas or *via* the airways into the lung. Several lines of evidence indicate that airway exchange is the more likely process in *Eptesicus fuscus*. A study of cutaneous gas exchange in euthermic *Eptesicus fuscus* measured gas exchange from the head and body separately (Herreid *et al.* 1968). The cutaneous output of  $\text{CO}_2$  ranged from 18.8 to  $104 \mu\text{mol CO}_2 \text{h}^{-1}$  for ambient temperatures of 18 and  $37.5^\circ\text{C}$ , respectively, with cutaneous  $\text{O}_2$  uptake reported to be insignificant. In that study, the wings of the bat were held open, increasing the

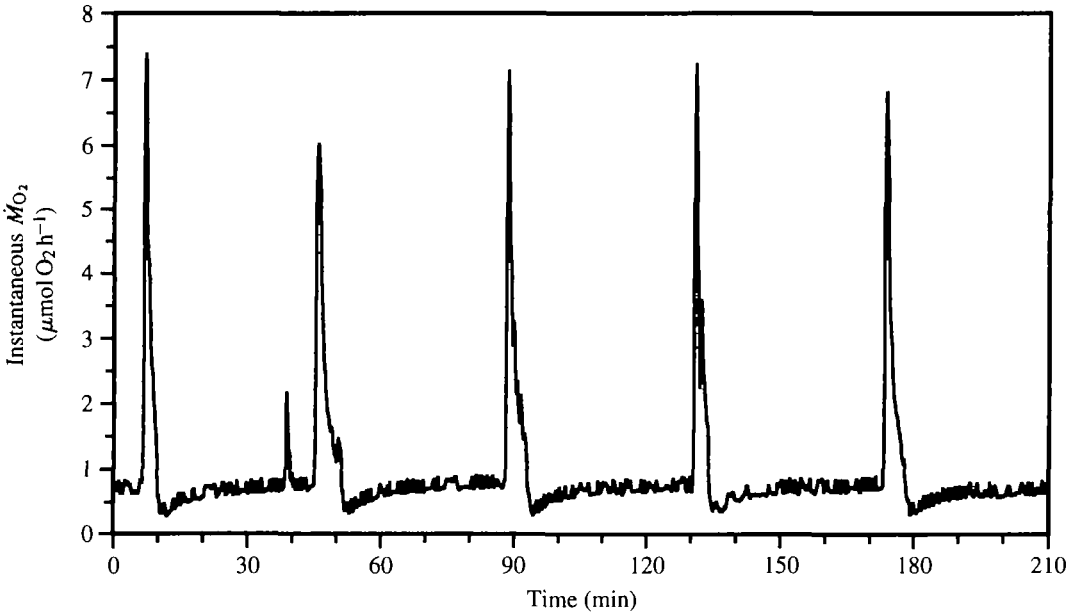

Fig. 2. Continuous oxygen uptake recording from torpid *Eptesicus fuscus* at  $T_b=10^\circ\text{C}$ . Intermittent ventilation bouts are revealed by the spikes. The small spike at 38 min is from a pair of sporadic breaths. Apneic periods were confirmed by simultaneous plethysmography. Minor fluctuations are instrument artifacts.

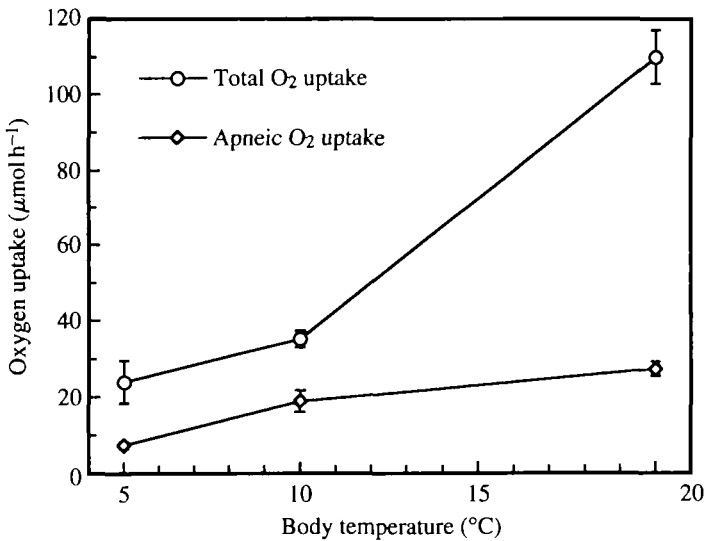

Fig. 3. Comparative mean rates of total to apneic oxygen uptake in torpid *Eptesicus fuscus* as a function of body temperature from 5 to  $20^\circ\text{C}$ . Note that the greatest contribution of apneic  $\text{O}_2$  uptake to the total  $\text{O}_2$  uptake was at  $T_b=10^\circ\text{C}$ . Error bars represent standard error.

available cutaneous surface area by approximately five times over the folded wing posture of the torpid bats in the present study. Because the cutaneous conductance of  $O_2$  is 20 times less than that of  $CO_2$  (Piiper *et al.* 1976), the potential for cutaneous  $O_2$  uptake of the bats in the present study would be two orders of magnitude less than the cutaneous  $CO_2$  exchange of the bats in the prior study. Therefore, the expected cutaneous  $O_2$  uptake would be at most  $0.2 \mu\text{mol } O_2 \text{ h}^{-1}$  for bats at  $T_b=20^\circ\text{C}$  and below, considerably less than the  $8.9\text{--}33.9 \mu\text{mol } O_2 \text{ h}^{-1}$  range of apneic  $O_2$  uptake measured in the present study. It is thus unlikely that cutaneous  $O_2$  uptake could account for more than a minor portion of the apneic  $O_2$  uptake measured in this study.

For effective gas exchange to occur by diffusion down the airway, the glottis must remain open during apnea. The cardiogenic pulsations recorded on the plethysmographic pressure trace (Fig. 1) strongly support an open glottis during apnea (Malan, 1973, 1982). There is no abrupt change in the quality of the pulsations in the transition from breathing to apnea that would indicate glottal closing. Based upon an analysis of breathing pattern and oxygen uptake, it was similarly concluded that the glottis remained open during apnea in torpid pipistrelle bats (Hays *et al.* 1991). Nevertheless, an investigation of non-ventilatory  $O_2$  uptake during apnea in the little brown bat, *Myotis lucifugus*, concluded that its glottis was closed during apnea (Thomas *et al.* 1990). This conclusion was based upon measured rates of non-ventilatory  $O_2$  uptake derived from numerical transformation of the instantaneous  $O_2$  uptake data. The transformation procedure may possibly have introduced uncertainty, particularly at the low levels of  $O_2$  uptake of  $6.5 \text{ g } Myotis \text{ lucifugus}$  at  $T_b=5^\circ\text{C}$ . Nonetheless, it is possible that there may be interspecies differences and that the glottis of *Myotis lucifugus* does remain closed during apnea, but the direct measurements of apneic  $O_2$  uptake and observation of cardiogenic pulses of the present study suggest otherwise. To explore this issue further, the following sections quantitatively examine  $O_2$  management during apnea in *Eptesicus fuscus*.

#### *Available oxygen stores during apnea*

During apnea, the bat's heart rate remains essentially constant. This continued circulation enables the tissues to withdraw  $O_2$  stored in the blood, which reduces its  $P_{O_2}$  and enables it to remove  $O_2$  stored in the lungs. The extent of these  $O_2$  stores will be calculated and then used to determine the duration of apnea that they can support. Comparing this result with the observed durations of apnea should suggest whether it is necessary to invoke a mechanism for replenishing  $O_2$  during apnea. The following calculations assume a fully  $O_2$ -loaded bat at the onset of a 1 h apnea at  $T_b=10^\circ\text{C}$ . The bat is presumed to be consuming  $O_2$  at the experimentally measured metabolic rate of  $35.2 \mu\text{mol } O_2 \text{ h}^{-1}$ . All gas volumes are corrected for  $10^\circ\text{C}$ ; the results from these calculations are compiled in Table 2.

#### *Blood stores*

The blood volume of bats is greater than that of other mammals; it has been determined to be about  $13 \text{ ml } 100 \text{ g}^{-1}$  body mass ( $M$ ) in the bat *Myotis lucifugus* (Kallen, 1960). Because blood volume scales proportional to  $M^{1.02}$  (Stahl, 1967), it may be estimated to be  $1.9 \text{ ml}$  for a  $15 \text{ g } Eptesicus \text{ fuscus}$ . Assuming 25% of this to be arterial blood with an

Table 2. *Estimated sources of oxygen in the torpid bat, Eptesicus fuscus, for 1 h of apnea at  $T_b=10^\circ\text{C}$* 

| Source                               | O <sub>2</sub><br>( $\mu\text{mol}$ ) | Percentage of total O <sub>2</sub><br>requirement for 1 h |
|--------------------------------------|---------------------------------------|-----------------------------------------------------------|
| Blood stores                         | 5.4                                   | 15.3                                                      |
| Lung stores                          | 1.9                                   | 5.4                                                       |
| Cutaneous O <sub>2</sub> absorption  | 0.2                                   | 0.6                                                       |
| O <sub>2</sub> diffusion             | 16.6                                  | 47.2                                                      |
| Initial O <sub>2</sub> convection    | 0.4                                   | 1.1                                                       |
| Continuous O <sub>2</sub> convection | 4.3                                   | 12.2                                                      |
| Total                                | 28.8                                  | 81.8                                                      |

The experimentally measured metabolic rate at  $T_b=10^\circ\text{C}$  was  $35.2 \mu\text{mol O}_2 \text{h}^{-1}$ .

O<sub>2</sub>-carrying capacity of  $6.83 \text{ mmol l}^{-1}$  (Malan, 1982), arterial blood should hold  $3.2 \mu\text{mol O}_2$ . Assuming a decrease in arterial saturation to 50% provides  $4.9 \mu\text{mol O}_2$  in venous blood for a total blood store of  $8.1 \mu\text{mol O}_2$  (an estimate, since the respiratory properties of this bat's blood have not been determined). However, bats are known to reduce haematocrit during torpor by splanchnic sequestering (Kallen, 1960; Martin and Stehn, 1977), so the total blood store of O<sub>2</sub> is probably unavailable. Thus, for this calculation, the estimated blood store will be reduced by one-third, yielding  $5.4 \mu\text{mol O}_2$ .

#### *Myoglobin stores*

Because of its high oxygen affinity, oxygen bound to myoglobin is not available to re-enter the circulation (Dejours, 1981), and thus is only useful to the tissue in which it resides, which is primarily muscle. Since apneic bats are inactive, myoglobin O<sub>2</sub> stores are considered to be inconsequential.

#### *Lung stores*

Allometric lung data, corrected for bats, suggest a functional residual capacity of  $0.322 \text{ ml}$  for *Eptesicus fuscus* (Brody, 1945; Maina and King, 1984). The end ventilatory  $P_{\text{aO}_2}$  was  $16 \text{ kPa}$ , and the end apneic  $P_{\text{aO}_2}$  was  $1.8 \text{ kPa}$  (Szewczak and Jackson, 1992a). Assuming the alveolar  $P_{\text{O}_2}$  to be similar, the concentration change may be estimated from:

$$\Delta C_{\text{O}_2} = \frac{\Delta P_{\text{O}_2}}{RT}, \quad (1)$$

in which  $R$  is the gas constant ( $0.06241 \text{ kPa}^{-1} \text{ mmol}^{-1} \text{ K}^{-1}$ ) and  $T$  is absolute temperature (Dejours, 1981). These  $P_{\text{O}_2}$  values indicate a lung O<sub>2</sub> concentration change of  $6.03 \text{ mmol l}^{-1}$ , for a quantity of  $1.9 \mu\text{mol O}_2$  ( $0.044 \text{ ml}$ ) stored at the onset of apnea.

Initial blood and lung O<sub>2</sub> stores can account for only 21% of the metabolic O<sub>2</sub> requirement during a 1 h apnea and are thus incapable of supporting apneas much longer than 12 min. If the presumption of splanchnic sequestering were removed, and all blood was available to the bat, then initial O<sub>2</sub> stores would be capable of supporting an apnea of

17 min, which is still less than the 56.7 min mean duration of apnea at  $T_b=10^\circ\text{C}$ . There must therefore be a process for replenishing  $\text{O}_2$  during apnea, which is consistent with the apneic  $\text{O}_2$  uptake measured by the present study.

#### *Available sources of oxygen replenishment during apnea*

Oxygen can enter the blood either through the skin or *via* the respiratory airways and membranes. The theoretical calculation of airway diffusion potential follows from Malan (1982). The conditions stated above also apply to the following calculations.

#### *Cutaneous oxygen absorption*

Based upon the study by Herreid *et al.* (1968) the cutaneous  $\text{O}_2$  uptake would be at most  $0.2 \mu\text{mol O}_2 \text{h}^{-1}$ , which is probably a conservative overestimate for  $T_b=10^\circ\text{C}$ . This is equivalent to only 0.6% of the bat's total  $\text{O}_2$  requirement, and capable of extending apnea by perhaps 1 min following exhaustion of initial  $\text{O}_2$  stores.

#### *Diffusion of oxygen into the lung*

The geometry of the airway can be estimated from reported values in *Myotis lucifugus* (Thomas *et al.* 1990) and scaled to fit *Eptesicus fuscus* using length and diameter scaled to  $M^{0.33}$  (Leith, 1982). This gives a tracheal length of 1.72 cm and a cross-sectional area of  $0.0095 \text{ cm}^2$ . Sample measurements of available *Eptesicus fuscus* specimens confirm these estimates (O. Mathieu-Costello, unpublished data). The airway length from the nares to the lung bifurcation was 1.6 cm, with a mid-trachea lumen of  $0.10 \text{ cm} \times 0.12 \text{ cm}$  providing a cross-sectional area of  $0.00942 \text{ cm}^2$ . The airway length from the bifurcation down the primary bronchi was 0.50 cm with a cross-sectional area of  $0.0101 \text{ cm}^2$ . The diffusional path can then be modeled as a cylinder of 2.1 cm length with a cross-sectional area of  $0.00958 \text{ cm}^2$ . The net diffusion rate ( $\dot{Q}$ ) is expressed by:

$$\dot{Q} = \frac{\Delta C_{\text{O}_2} \times \text{area}}{\text{distance}} \times D, \quad (2)$$

where  $D$  is the diffusivity of  $\text{O}_2$  at  $10^\circ\text{C}$  ( $0.187 \text{ cm}^2 \text{ s}^{-1}$ ) (Schmidt-Nielsen, 1979; Weast, 1979). The concentration gradient may be estimated by subtracting the mean ventilatory and apneic  $P_{\text{aO}_2}$  value (8.9 kPa) (Szewczak and Jackson, 1992a) from the ambient atmospheric  $P_{\text{O}_2}$  (21.2 kPa, assuming normal pressure and dry air in the chamber). This gives an  $\text{O}_2$  concentration gradient of 12.3 kPa, or  $5.41 \mu\text{mol O}_2 \text{ cm}^{-3}$  in consistent units. Applying equation 2 to all these figures yields a net  $\text{O}_2$  diffusion of  $16.6 \mu\text{mol O}_2 \text{ h}^{-1}$  ( $0.385 \text{ ml O}_2 \text{ h}^{-1}$ ), which is 47.2% of the bat's total  $\text{O}_2$  requirement at  $T_b=10^\circ\text{C}$ .

#### *Bulk convection of oxygen into the lung*

As a consequence of the respiratory quotient and the high  $\text{CO}_2$  capacitance of blood and tissues (Dejours, 1981),  $\text{CO}_2$  incompletely replaces the volume of  $\text{O}_2$  absorbed from the lungs. Instead of contracting, the mechanical forces acting on the lung maintain it at a constant volume, and thus it draws an influx of ambient air (Malan, 1982). The diffusive efflux of  $\text{CO}_2$  is limited by flowing counter to this influx and by its smaller concentration gradient and lower diffusivity compared to  $\text{O}_2$  ( $0.144 \text{ cm}^2 \text{ s}^{-1}$  at  $10^\circ\text{C}$ ) (Weast, 1979).



The mean ventilatory to apneic  $P_{aCO_2}$  was 3.2 kPa (Szewczak and Jackson, 1992a). From this value, the net diffusive efflux of  $CO_2$  is estimated to be  $3.98 \mu\text{mol } CO_2 \text{ h}^{-1}$  ( $0.092 \text{ ml h}^{-1}$ ). For an assumed respiratory quotient of 0.78, the total  $\dot{M}_{CO_2}$  would be  $27.5 \mu\text{mol h}^{-1}$  ( $0.635 \text{ ml h}^{-1}$ ). This leaves  $23.5 \mu\text{mol h}^{-1}$  ( $0.543 \text{ ml h}^{-1}$ ) of  $CO_2$  to accumulate in the blood and tissues, with some cutaneous release, but it is unlikely that all of it fills the lungs. Metabolic absorption of the diffusive influx of  $0.385 \text{ ml O}_2 \text{ h}^{-1}$ , along with the diffusive efflux of  $0.092 \text{ ml CO}_2 \text{ h}^{-1}$ , combine to yield a continuous convective influx of  $0.477 \text{ ml h}^{-1}$  of air, providing an additional  $4.3 \mu\text{mol O}_2 \text{ h}^{-1}$ . Absorption of the initial lung store of  $0.044 \text{ ml O}_2$  provides a one-time bulk convection of  $0.044 \text{ ml}$  of air, furnishing  $0.4 \mu\text{mol O}_2$ . Thus, the total bulk influx of  $O_2$  during the first hour of apnea would be  $4.7 \mu\text{mol}$ . This process would contribute 13.3% of the bat's total  $O_2$  requirement.

The processes of diffusion and bulk convection combine to provide  $21.3 \mu\text{mol O}_2$  during this theoretical first hour of apnea. This provides 60.5% of the bat's  $O_2$  requirement. Because it is based upon diffusion, the rate of this process should be dependent upon concentration gradient. This notion is consistent with the time course of instantaneous  $O_2$  uptake recordings (Fig. 2). Following a ventilatory bout,  $O_2$  stores are at capacity. This minimizes the concentration gradient, and hence  $O_2$  influx. Consuming the initial  $O_2$  stores improves the gradient and enhances the rate of  $O_2$  uptake. This continues until an equilibrium is achieved between  $O_2$  consumption and diffusion capacity, which then stabilizes the rate. The calculated equilibrium apneic  $O_2$  uptake rate of  $20.9 \mu\text{mol O}_2 \text{ h}^{-1}$  (diffusive plus convective flux, following exhaustion of initial stores) also compares favorably with the measured rate of  $18.9 \pm 2.9 \mu\text{mol O}_2 \text{ h}^{-1}$  for bats at  $T_b = 10^\circ\text{C}$ . We thus conclude that passive  $O_2$  influx down the airway is the most likely mechanism by which these bats acquire  $O_2$  during apnea.

#### *Possible role of cardiogenic mixing and the influence of temperature on apneic oxygen uptake*

The idealized airway cylinder used in the above calculation did not consider potential resistances such as those from oral or nasal airways. Thus, the actual  $O_2$  influx might be expected to be less than the calculated value. However, some experimentally measured rates of apneic  $O_2$  uptake were actually higher (e.g.  $24.9 \mu\text{mol O}_2 \text{ h}^{-1}$  measured vs  $20.9 \mu\text{mol O}_2 \text{ h}^{-1}$  calculated for  $T_b = 10^\circ\text{C}$ ). Because the above calculation assumed passive diffusion in still air, the difference may result from mechanical agitation of gases within the airways. It has been previously suggested that the mechanical action from the heart, i.e. cardiogenic mixing, may facilitate diffusion potential (West and Hugh-Jones, 1961; Fukuchi *et al.* 1976). Indeed, the cardiogenic pulses recorded from *Eptesicus fuscus* are suggestively prominent relative to the ventilation movements (Fig. 1).

Cardiogenic mixing may also influence the observed temperature-dependency of apneic  $O_2$  uptake. The  $Q_{10}$  for diffusion of  $O_2$  in air is about 1.2 (Dejours, 1981), whereas the  $Q_{10}$  of the rate of apneic  $O_2$  uptake from  $T_b = 10$  to  $20^\circ\text{C}$  was 2.4, and from  $T_b = 5$  to  $10^\circ\text{C}$  was 4.5. The departure of these values from a  $Q_{10}$  of 1.2 indicates a dependency upon some other factor in addition to temperature. (Any temperature effects on haemoglobin affinity for  $O_2$  would favorably influence the  $O_2$  concentration gradient and

reduce the  $Q_{10}$ , rather than increase it.) The effect of cardiogenic mixing may be accentuated at low heart rates, in which it first breaks up the stratification of gases that inhibits diffusion (Fukuchi *et al.* 1976). At  $T_b=5^\circ\text{C}$ , the average interval between heartbeats is 7 s, a plausible interval for stratification to occur in small airways. Thus, the large  $Q_{10}$  of 4.5 from  $T_b=5$  to  $10^\circ\text{C}$  could be attributed to the differential effects of cardiogenic mixing at these temperatures.

The observation of cardiogenic pulsations and a theoretical calculation of  $\text{O}_2$  diffusion support the conclusion that apneic  $\text{O}_2$  uptake occurs down an open airway. This process is apparently enhanced by the mechanical action of the heart, which could properly be considered to be an important respiratory organ for this animal.

We thank Dr Andre Malan for his helpful comments and encouragement of this investigation. We gratefully acknowledge the assistance of Dr Odile Mathieu-Costello who provided airway morphometric data. This work was supported by Grant DCB8802045 from the National Science Foundation (D.C.J.).

### References

- BRODY, S. (1945). *Bioenergetics and Growth*. New York: Reinhold; (reprinted in 1968, New York: Hafner).
- CLAUSEN, G. AND ERSLAND, A. (1968). The respiratory properties of the blood of the hibernating hedgehog *Erinaceus europaeus* L. *Respir. Physiol.* **5**, 221–233.
- DEJOURS, P. (1981). *Principles of Comparative Respiratory Physiology*. 265pp. New York: Elsevier/North Holland Biomedical Press.
- ELSNER, R. (1965). Heart rate response in forced *versus* trained experimental dives in pinnipeds. *Hvalrådets Skrifter* **48**, 24–29.
- FUKUCHI, Y., ROUSSOS, C. S., MACKLEM, P. T. AND ENGEL, L. A. (1976). Convection, diffusion and cardiogenic mixing of inspired gas in the lung; an experimental approach. *Respir. Physiol.* **26**, 77–90.
- GEISER, F. (1988). Reduction of metabolism during hibernation and daily torpor in mammals and birds: temperature effect or physiological inhibition? *J. comp. Physiol. B* **158**, 25–37.
- HAYS, G. C., WEBB, P. I. AND SPEAKMAN, J. R. (1991). Arrhythmic breathing in torpid pipistrelle bats, *Pipistrellus pipistrellus*. *Respir. Physiol.* **85**, 185–192.
- HERREID, C. F., II, BRETZ, W. L. AND SCHMIDT-NIELSEN, K. (1968). Cutaneous gas exchange in bats. *Am. J. Physiol.* **215**, 506–508.
- KALLEN, F. C. (1960). Plasma and blood volumes in the little brown bat. *Am. J. Physiol.* **198**, 999–1005.
- LEITH, D. E. (1982). Mammalian tracheal dimensions: scaling and physiology. *J. appl. Physiol.* **55**, 196–200.
- MAINA, J. N. AND KING, A. S. (1984). Correlations between structure and function in the design of the bat lung: a morphometric study. *J. exp. Biol.* **111**, 43–61.
- MALAN, A. (1973). Ventilation measured by whole body plethysmography in hibernating animals and poikilotherms. *Respir. Physiol.* **17**, 32–44.
- MALAN, A. (1982). Respiration and acid–base state in hibernation. In *Hibernation and Torpor in Mammals and Birds* (ed. C. P. Lyman, J. S. Willis, A. Malan and L. C. H. Wang), pp. 237–282. New York: Academic Press.
- MARTIN, K. H. AND STEHN, R. A. (1977). Blood and spleen response to isolation and cold stress in little brown bats, *Myotis lucifugus*. *Acta. Zool. (Stockh.)* **58**, 53–59.
- PIPER, J., GATZ, R. N. AND CRAWFORD, E. C. (1976). Gas transport in an exclusively skin-breathing salamander, *Desmognathus fuscus* (Plethodontidae). In *Respiration of Amphibious Vertebrates* (ed. G. M. Hughes), pp. 339–356. New York: Academic Press.
- SCHMIDT-NIELSEN, K. (1979). *Animal Physiology: Adaptation and Environment*. 534pp. Cambridge, New York: Cambridge University Press.

- STAHL, W. R. (1967). Scaling of respiratory variables in mammals. *J. appl. Physiol.* **22**, 453–460.
- SZEWCAK, J. M. AND JACKSON, D. C. (1992a). Acid–base state and intermittent breathing in the torpid bat, *Eptesicus fuscus*. *Respir. Physiol.* **88**, 205–215.
- SZEWCAK, J. M. AND JACKSON, D. C. (1992b). Ventilatory response to hypoxia and hypercapnia in the torpid bat, *Eptesicus fuscus*. *Respir. Physiol.* **88**, 217–232.
- THOMAS, D. W., CLOUTIER, D. AND GAGNÉ, D. (1990). Arrhythmic breathing, apnea and non-steady-state oxygen uptake in hibernating little brown bats (*Myotis lucifugus*). *J. exp. Biol.* **149**, 395–406.
- WEAST, R. C. (1979). *CRC Handbook of Chemistry and Physics*. Boca Raton, Florida: CRC Press.
- WEST, J. B. AND HUGH-JONES, P. (1961). Pulsatile gas flow in bronchi caused by the heart beat. *J. appl. Physiol.* **16**, 697–702.
